# Supplementary material for: Synthesis of pyrrole and indole quinoxalinone and oxazinone derivatives by intramolecular copper-catalyzed reactions
Source: Royal Society of Chemistry journal article supplement (doi:10.1039/c1ob05269a), 2011-01-01
Supplement: c1ob05269a_2.pdf [file c1ob05269a_2.pdf]

## Synthesis of pyrrole and indole quinoxalinone and oxazinone derivatives by intramolecular copper-catalyzed reactions

Victoria A. Vaillard, Roberto A. Rossi, Sandra E. Martín

### Corrections

Following the study on the synthesis and derivatization of pyrrole and indole quinoxalinone, we tried to derivatize the pyrrolo[1,2-*a*]quinoxalin-4(5*H*)-one (**3a**) compound to obtain 4-chloropyrrolo[1,2-*a*]quinoxaline by methods described in the literature;<sup>1</sup> however, it was not possible to carry out this reaction. These results led us to infer that the structures of the compounds reported in *Org. Biomol. Chem.*, 2011, **9**, 4927-4935 had not been properly characterized. We decided to reevaluate the spectroscopic data of compound **3a**<sup>2</sup> for which experiments of Nuclear Magnetic Spectroscopy such as HMBC and NOESY were performed. Their detailed analysis allowed us to conclude that the product obtained in the intramolecular copper-catalyzed reactions of *N*-(2-bromophenyl)-1*H*-pyrrole-2-carboxamide (**1a**) corresponds to 2-(1*H*-pyrrol-2-yl)benzo[*d*]oxazole. This conclusion can also be applied to all products derived from pyrrole and indole carboxamides **1b**, **1c**, **1d**, **1e**, **2a**, **2b**, **2c**. In view of this, we would need to correct and replace **3a**, **3b**,<sup>3</sup> **3c**, **3d**, **3e**, **5a**, **5b** and **5c** structures by the benzoxazole derivatives (**Figure 1**).

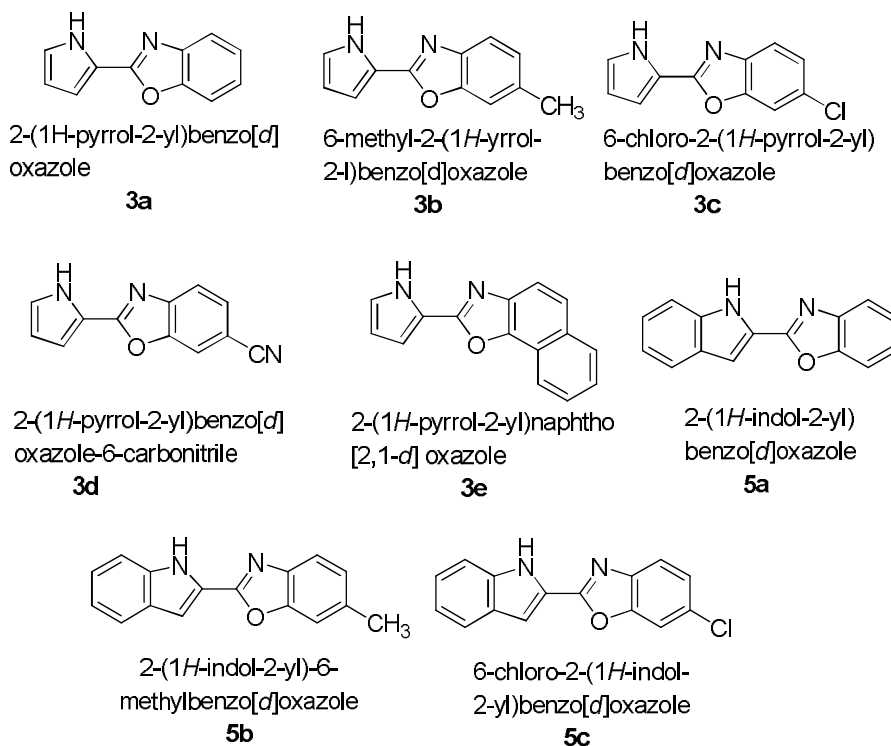

**Figure 1:** Benzoxazole ring obtained by intramolecular copper-catalyzed reaction with carboxamides derived from pyrrole and indole.

## Notes and References

- 1 (a) Campiani, G., Cappelli, A., Nacci, V., Anzini, M., Vomero, S., Hamon, M., Cagnotto, A., Fracasso, C., Uboldi, C., Caccia, S., Consolo, S., Mennini, T.; *J. Med. Chem.*, 1997, **40**, 3670-3678. (b) Guillon, J., Grellier, P., Labaied, M., Sonnet, P., Léger, J-M-, Déprez-Poulain, R., Forfar-Bares, I., Dallemagne, P., Lemaître, N., Péhourcq, F., Rochette, J., Sergheraert, C., Jarry, C., *J. Med. Chem.* 2004, **47**, 1997-2009.
- 2 Spectroscopy data for **3a** compound from HMBC and NOESY experiments. HMBC (Heteronuclear Multiple Bond Correlation) in CDCl<sub>3</sub> <sup>1</sup>H-<sup>13</sup>C  $\delta$ H- $\delta$ C : 6.38/119.8 (pyrrole proton/ pyrrole quaternary carbon), 6.38/113.2 (pyrrole proton/pyrrole carbon), 6.38/123.0 (pyrrole proton/pyrrole carbon), 7.05/110.8 (pyrrole proton/pyrrole carbon), 7.05/113.2 (pyrrole proton/pyrrole carbon), 7.05/119.8 (pyrrole proton/pyrrole quaternary carbon), 7.10/119.8 (pyrrole proton/pyrrole quaternary carbon), 7.10/123.0 (pyrrole proton/pyrrole carbon), 7.32/110.4 (aromatic proton/aromatic carbon), 7.32/118.8 (aromatic proton/aromatic carbon), 7.32/141.8 (aromatic proton/aromatic quaternary carbon), 7.32/150.2 (aromatic proton/aromatic quaternary carbon), 7.54/124.4 (aromatic proton/aromatic carbon), 7.54/124.6 (aromatic proton/aromatic carbon), 7.54/141.8 (aromatic proton/aromatic quaternary carbon), 7.54/150.2 (aromatic proton/aromatic quaternary carbon), 7.66/124.4 (aromatic proton/aromatic carbon), 7.66/124.6 (aromatic proton/aromatic carbon), 7.66/150.2 (aromatic proton/aromatic quaternary carbon). NOESY (Proton-proton through-space interactions via NOE)  $\delta$ H- $\delta$ H: 6.38/7.09, 7.05/6.38, 7.05/10.51 (pyrrole proton/pyrrole NH). This compound was previously described (C. Praveen, K. H. Kumar, D. Muralidharan and P. T., Perumal, *Tetrahedron*, 2008, **64**, 2369-2374; K. G. Ozokan, M. K. Gumus and S. Kaban, *J. Heterocycl. Chem.*, 2008, **45**, 1831-1834), but data from 2D NMR experiments are not reported.
- 3 HMBC and NOESY experiments carried out with this compound allowed us to reach the same conclusion as **3a**.

### Additional spectra data for compounds 3a, 3b, 3c, 5a, 5b and 5c

$^1\text{H}$ - $^{13}\text{C}$  HMBC 2-(1*H*-pyrrol-2-yl)benzo[d]oxazole ( $\text{CDCl}_3$ ) **3a**

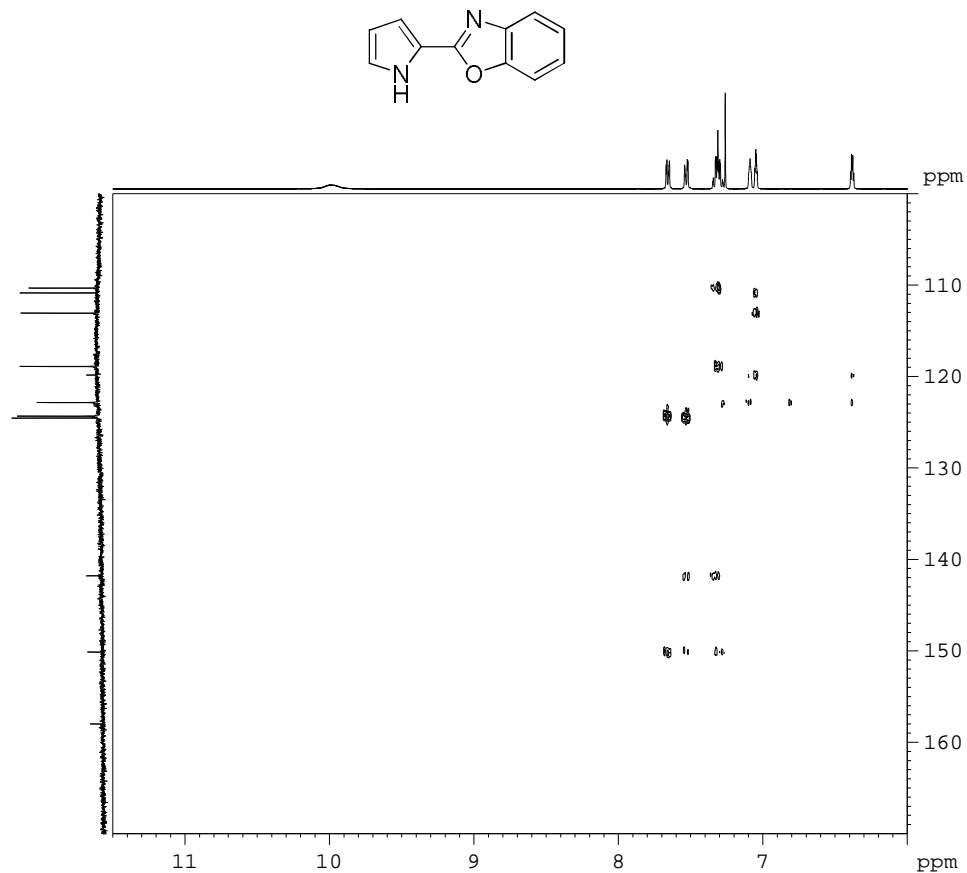

$^1\text{H}$ - $^{13}\text{C}$  HMBC NMR ( $\text{CDCl}_3$ )  $\delta\text{H}/\delta\text{C}$  : 6.38/113.2, 6.38/119.8, 6.38/123.0, 7.05/110.8, 7.05/113.2, 7.10/119.8, 7.10/123.0, 7.32/118.8, 7.32/141.8, 7.32/150.4, 7.54/124.4, 7.54/124.6, 7.54/141.8, 7.54/150.2, 7.66/124.4, 7.66/124.5, 7.66/141.9, 7.66/150.2.

$^1\text{H}$ - $^1\text{H}$  NOESY NMR 2-(1*H*-pyrrol-2-yl)benzo[d]oxazole ( $\text{CDCl}_3$ ) **3a**.

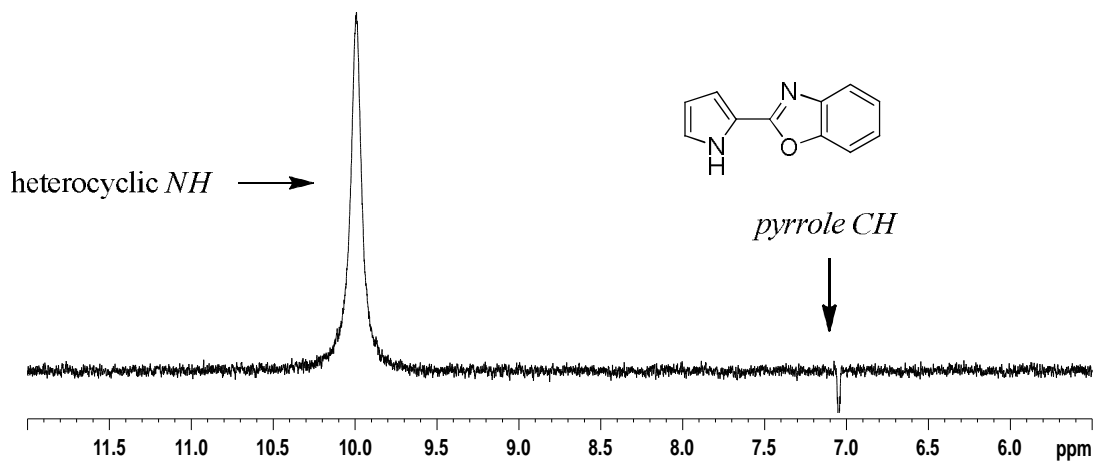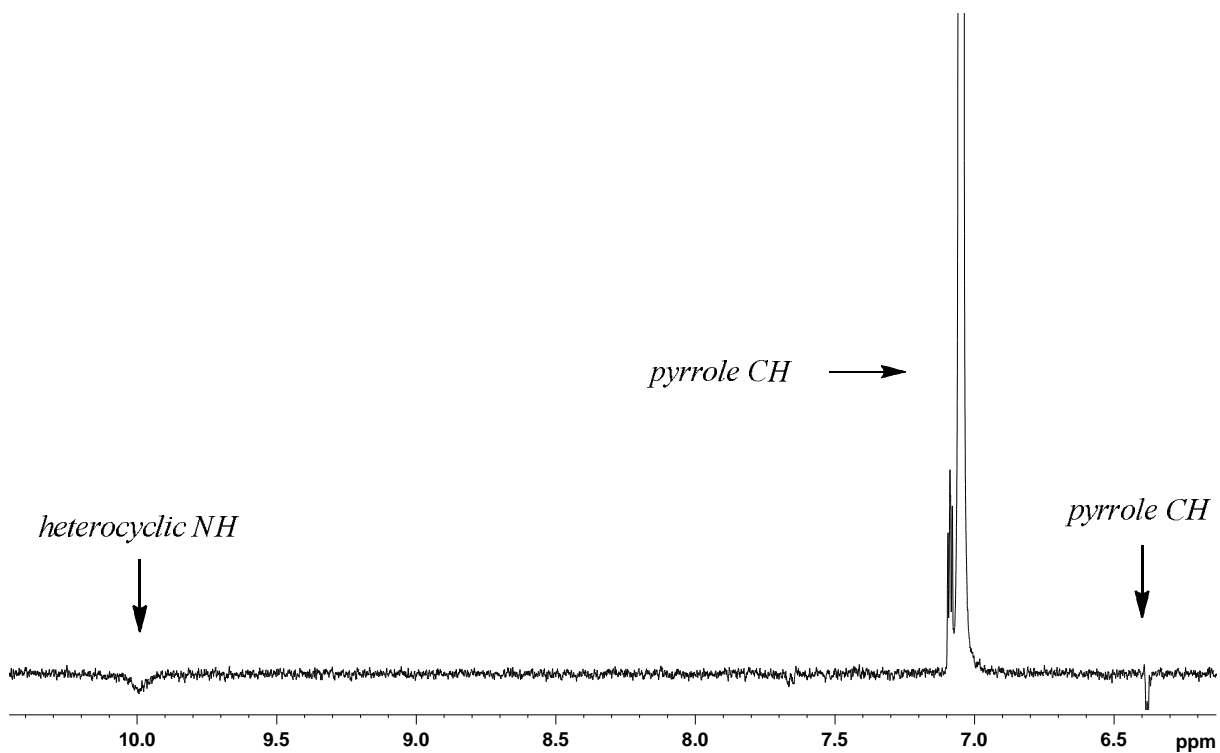

$^1\text{H}$ - $^1\text{H}$  NOESY NMR 2-(1*H*-pyrrol-2-yl)benzo[d]oxazole ( $\text{CDCl}_3$ ) **3a**.

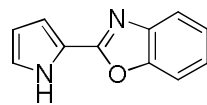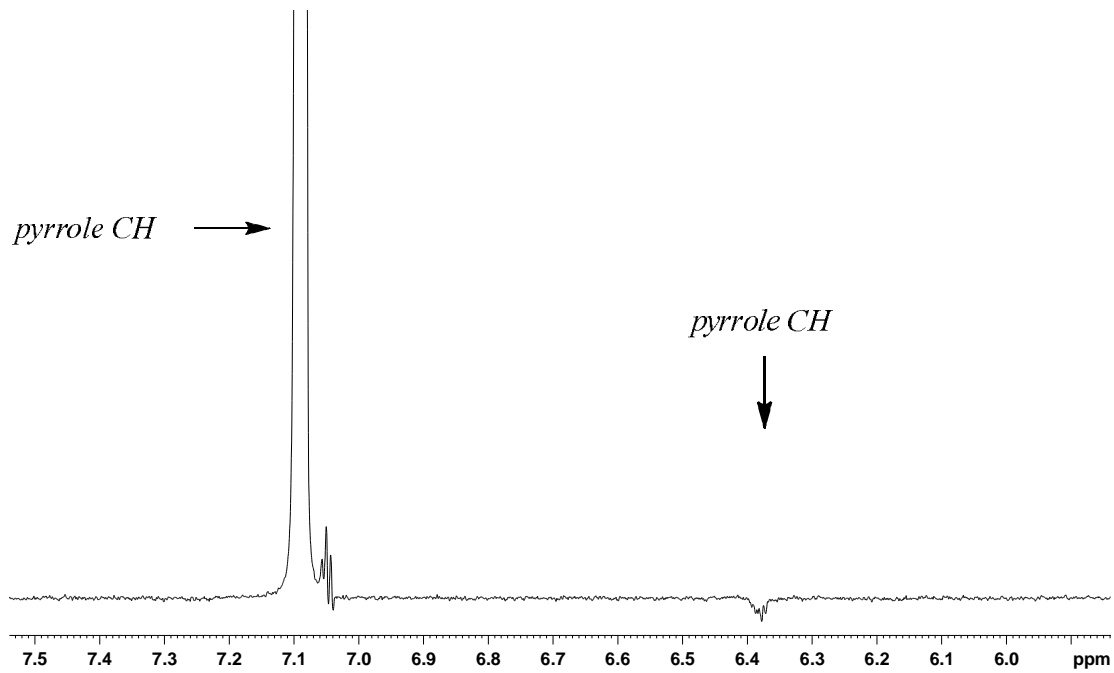

$^1\text{H}$ - $^1\text{H}$  NOESY NMR ( $\text{CDCl}_3$ )  $\delta\text{H}/\delta\text{H}$ : 6.38/7.09, 7.05/6.38, 7.05/10.51.

$^1\text{H}$ - $^{13}\text{C}$  HMBC NMR 6-methyl-2-(1*H*-pyrrol-2-yl)benzo[*d*]oxazole (acetone-*d*<sub>6</sub>)**3b**.

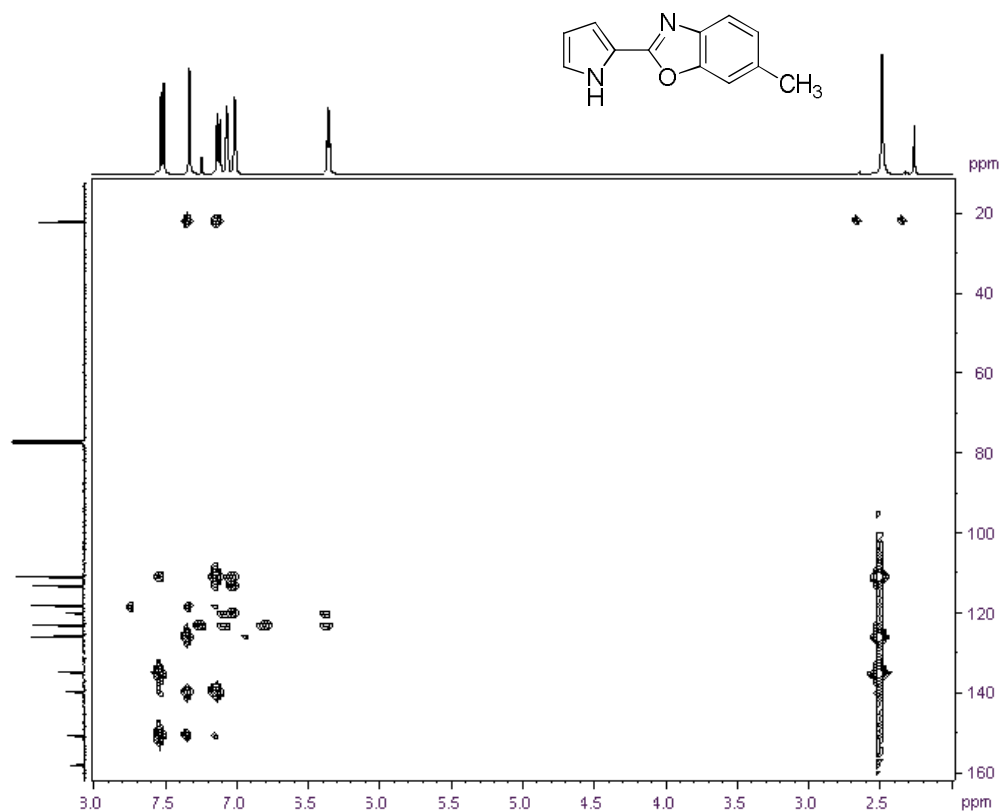

$^1\text{H}$ - $^{13}\text{C}$  HMBC NMR (CDCl<sub>3</sub>)  $\delta\text{H}/\delta\text{C}$  : 2.48/110.6, 2.48/125.7, 2.48/134.7, 6.35/119.9, 6.35/122.9, 7.01/110.6, 7.01/112.9, 7.01/119.9, 7.07/119.9, 7.07/122.9, 7.12/21.7, 7.12/110.7, 7.12/139.5, 7.33/21.7, 7.33/118.1, 7.33/125.7, 7.33/139.5, 7.33/150.4, 7.52/110.7, 7.52/134.7, 7.52/150.4.

$^1\text{H}$ - $^{13}\text{C}$  HMBC NMR 6-chloro-2-(1*H*-pyrrol-2-yl)benzo[*d*]oxazole ( $\text{CDCl}_3$ ) **3c**.

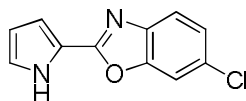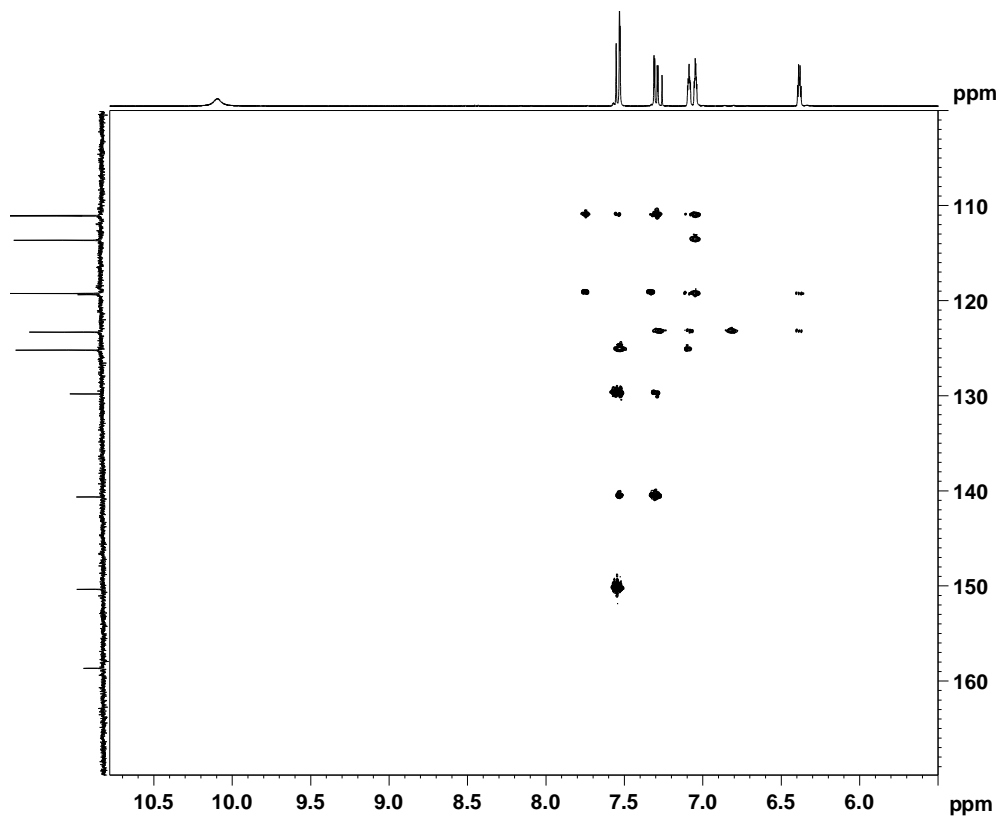

$^1\text{H}$ - $^{13}\text{C}$  HMBC NMR ( $\text{CDCl}_3$ ) $\delta\text{H}/\delta\text{C}$ : 6.38/119.2, 6.38/123.3, 7.05/111.1, 7.05/113.6, 7.05/119.4, 7.05/123.3, 7.09/123.3, 7.09/125.2, 7.30/111.1, 7.30/123.3, 7.30/129.8, 7.30/140.6, 7.54/111.1, 7.54/119.4, 7.54/125.2, 7.54/129.8, 7.54/140.6, 7.54/150.5.

$^1\text{H}$ - $^{13}\text{C}$  HMBC NMR 2-(1*H*-indol-2-yl)benzo[*d*]oxazole ( $\text{CDCl}_3$ ) **5a**.

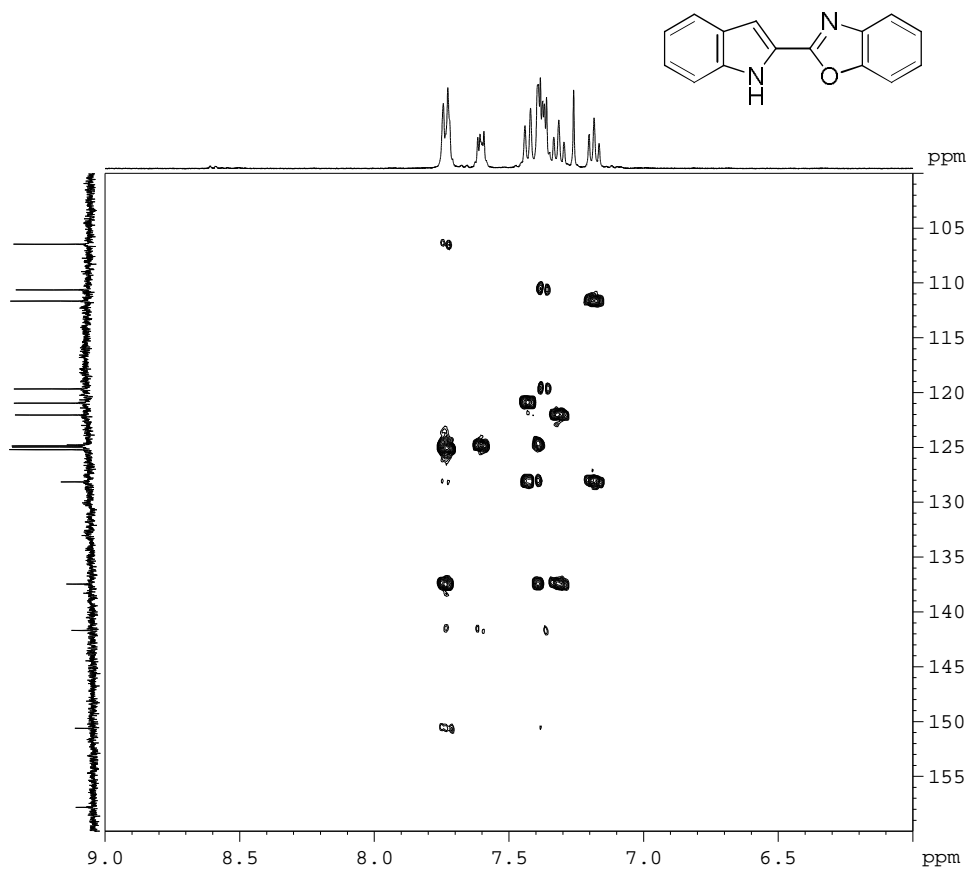

$^1\text{H}$ - $^{13}\text{C}$  HMBC NMR ( $\text{CDCl}_3$ )  $\delta\text{H}/\delta\text{C}$ : 7.18/111.7, 7.18/128.1, 7.31/110.6, 7.31/122.0, 7.31/137.5, 7.37/119.6, 7.37/141.6, 7.41/120.9, 7.41/124.8, 7.41/128.1, 7.41/137.5, 7.61/124.9, 7.61/141.6, 7.73/106.5, 7.73/124.9, 7.73/137.5, 7.73/141.6, 7.73/150.6.



$^1\text{H}$ - $^1\text{H}$  NOESY NMR 2-(1*H*-indol-2-yl)benzo[*d*]oxazole ( $\text{CDCl}_3$ ) **5a**.

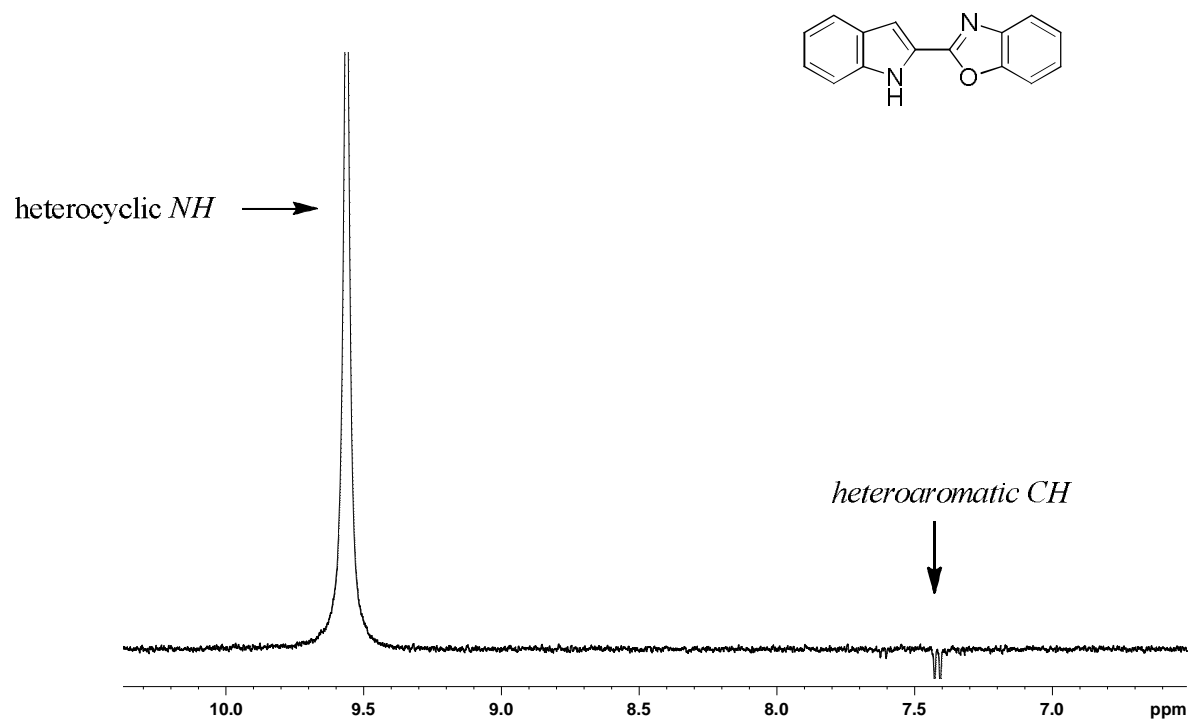

$^1\text{H}$ - $^1\text{H}$  NOESY NMR ( $\text{CDCl}_3$ )  $\delta\text{H}/\delta\text{H}$ : 7.41/9.76.

$^1\text{H}$ - $^{13}\text{C}$  HMBC NMR 2-(1*H*-indol-2-yl)-6-methylbenzo[*d*]oxazole ( $\text{CDCl}_3$ ) **5b**

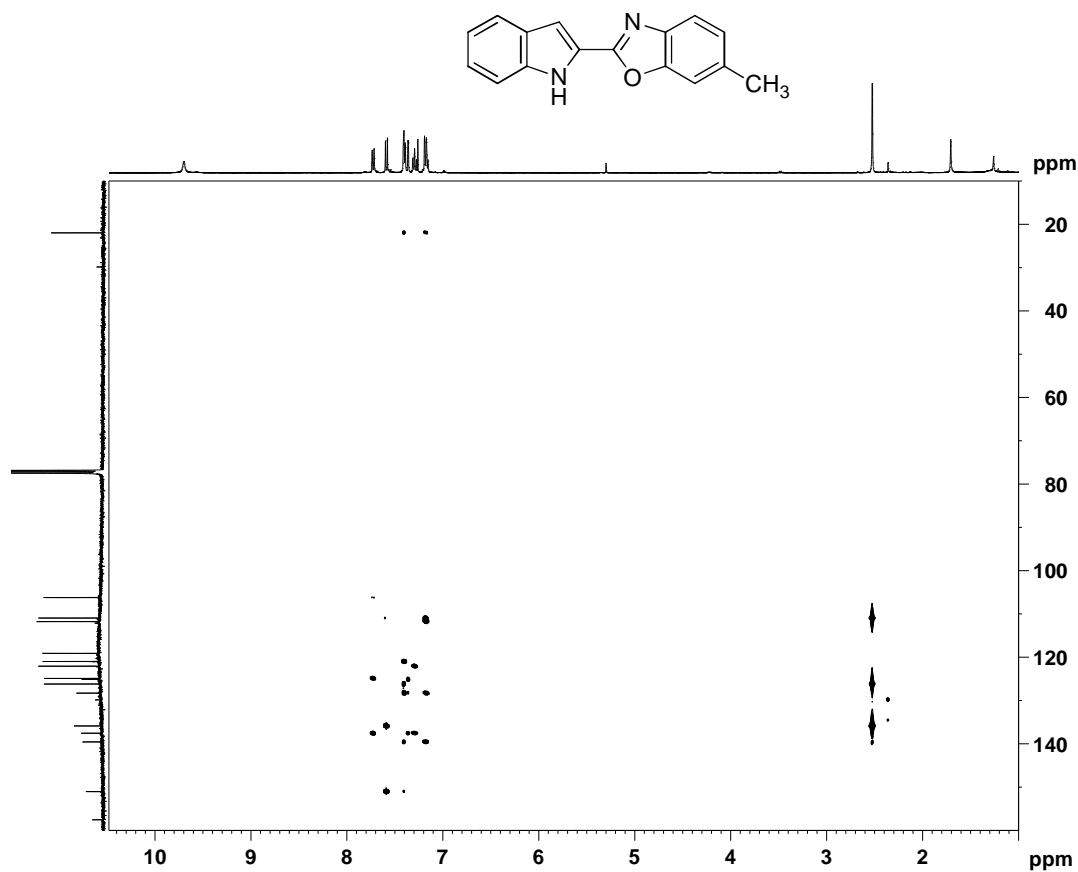

$^1\text{H}$ - $^{13}\text{C}$  HMBC NMR ( $\text{CDCl}_3$ )  $\delta\text{H}/\delta\text{C}$ : 2.52/110.9, 2.52/126.2, 2.52/135.9, 7.18/110.9, 7.18/128.3, 7.18/139.6, 7.29/122.1, 7.29/137.6, 7.36/122.1, 7.36/137.6, 7.40/121.0, 7.40/126.2, 7.40/128.3, 7.40/139.6, 7.59/135.9, 7.59/151.0.

$^1\text{H}$ - $^{13}\text{C}$  HMBC NMR 6-chloro-2-(1*H*-indol-2-yl)benzo[*d*]oxazole ( $\text{CDCl}_3$ ) **5c**.

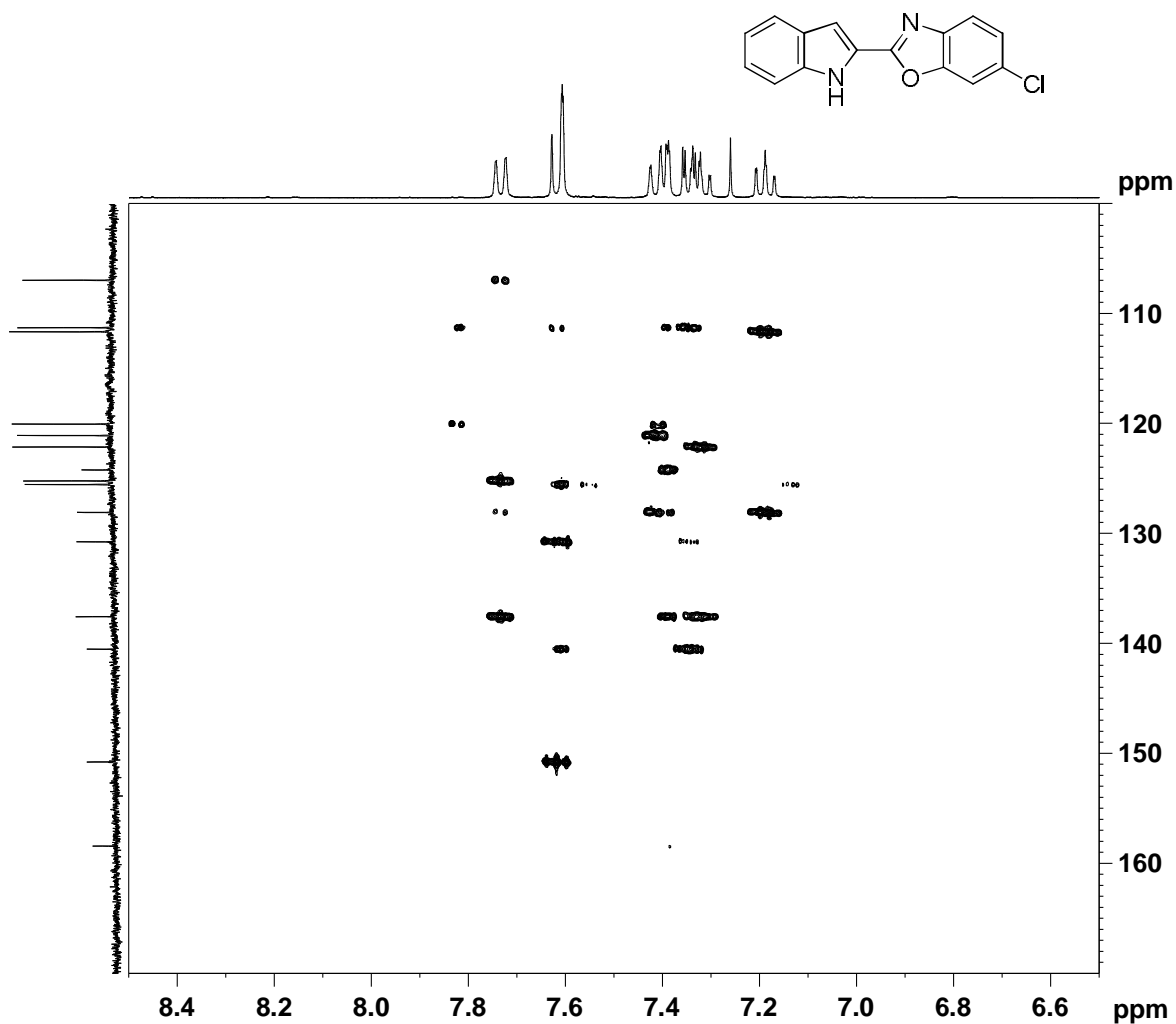

$^1\text{H}$ - $^{13}\text{C}$  HMBC NMR ( $\text{CDCl}_3$ )  $\delta\text{H}/\delta\text{C}$ : 7.19/111.7, 7.19/128.1, 7.33/111.3, 7.33/122.1, 7.33/137.6, 7.33/140.5, 7.40/120.0, 7.40/111.3, 7.40/121.1, 7.40/124.2, 7.40/128.1, 7.40/137.6, 7.61/125.2, 7.61/130.8, 7.61/140.5, 7.61/150.8, 7.73/107.0, 7.73/125.2, 7.73/137.6.
